# Supplementary material for: Urolithin a Ameliorates the TGF Beta-Dependent Impairment of Podocytes Exposed to High Glucose
Source: Preprints.org preprint supplement (doi:10.20944/preprints202407.0378.v1), 2024-07-04
Supplement: Supplementary file 1 [file supplementary]

Table S1. Primary antibodies.

| Primary Antibody | Application and Dilution | Catalog number | Source |
| --- | --- | --- | --- |
| Nephrin (G-8) | FC 1:200, IF 1:50 | sc-376522 | Santa Cruz Biotechnology, U.S. |
| Nephrin | FC 1:100, WB 1:500 | ab216341 | Abcam, Cambridge, UK |
| Integrin-b3 | IF 1:50 WB 1:1000 | sc-46655 | Santa Cruz Biotechnology, U.S. |
| Fibronectin | WB 1:1000 | ab2413 | Abcam, Cambridge, UK |
| TβRI | IF 1:100 | PA5-3263 | Invitrogen, Thermo Fisher Scientific, U.S. |
| TβRII | IF 1:100 | ab61213 | Abcam, Cambridge, UK |
| Smad2 | IF 1:100 WB 1:1000 | 51-1300 | Invitrogen, Thermo Fisher Scientific, U.S. |
| p-Smad2 | IF 1:100 WB 1:1000 | 44-244G | Invitrogen, Thermo Fisher Scientific, U.S. |

**WB**:Western blot, **IF**: Immunofluorescence

Table S2. Secondary antibodies.

| Secondary Antibody |  | Application and  Dilution | Catalog number | Source |
| --- | --- | --- | --- | --- |
| Goat anti-rabbit/Alexa Fluor 647 |  | IF 1:100 | ab150079 | Abcam, Cambridge, UK |
| Goat anti-mouse/Alexa Fluor 488 |  | IF 1:100 | ab150113 | Abcam, Cambridge, UK |
| MFP™-DY-490-Phalloidin |  | IF 1:100 | MFP-D490-33 | MoBiTec Molecular Biotechnology, Germany |
| Anti-rabbit IgG, HRP-linked |  | WB 1: 2000 | 7074S | Cell Signaling Technology, U.S. |
| Anti-mouse IgG, HRP-linked |  | WB 1: 2000 | 7076 | Cell Signaling Technology, U.S. |

**WB**:Western blot, **IF**: Immunofluorescence, **HRP-linked**: Horseradish peroxidase-linked
